# Supplementary material for: Mutations in Plasmodium falciparum actin-binding protein coronin confer reduced artemisinin susceptibility
Source: PubMed Central journal article supplement — Proc Natl Acad Sci U S A. 2018 Nov 12;115(50):12799–804. doi: 10.1073/pnas.1812317115 (PMC6294886; doi:10.1073/pnas.1812317115), 2018-11-12
Supplement: pnas.1812317115.sapp.pdf [file pnas.1812317115.sapp.pdf]

Supplementary Information for

**Mutations in Plasmodium falciparum Actin-binding Protein Coronin Confer Reduced Artemisinin Susceptibility**

Allison R. Demas<sup>1a</sup>, Aabha I. Sharma<sup>1a</sup> Wesley Wong<sup>a</sup>, Angela M. Early<sup>b</sup>, Seth Redmond<sup>b</sup>,  
Selina Bopp<sup>a</sup>, Daniel E. Neafsey<sup>a,b</sup>, Sarah K. Volkman<sup>a,b,c</sup>, Daniel L. Hartl<sup>a,d</sup>, Dyann F. Wirth<sup>a,b,2</sup>

<sup>a</sup> Department of Immunology and Infectious Diseases, Harvard T.H. Chan School of Public Health, 665 Huntington Avenue, Boston, MA 02115, U.S.A.

<sup>b</sup> Infectious Disease and Microbiome Program, Broad Institute, 415 Main St, Cambridge, MA 02142, U.S.A.

<sup>c</sup> School of Nursing and Health Sciences, Simmons College, 300 The Fenway Boston, MA 02115, U.S.A.

<sup>d</sup> Department of Organismic and Evolutionary Biology, Harvard University, 16 Divinity Street, Cambridge, MA 02138, U.S.A.

<sup>1</sup>These two authors contributed equally to the work.

<sup>2</sup> Corresponding author. Mailing address: Department of Immunology and Infectious Diseases, Harvard T.H. Chan School of Public Health, 665 Huntington Avenue, Boston, MA 02115, U.S.A. telephone: (617) 432-2214, e-mail: [dhartl@oeb.harvard.edu](mailto:dhartl@oeb.harvard.edu) and [dfwirth@hsph.harvard.edu](mailto:dfwirth@hsph.harvard.edu)

**This PDF file includes:**

Figs. S1 to S8

Tables S1 to S2

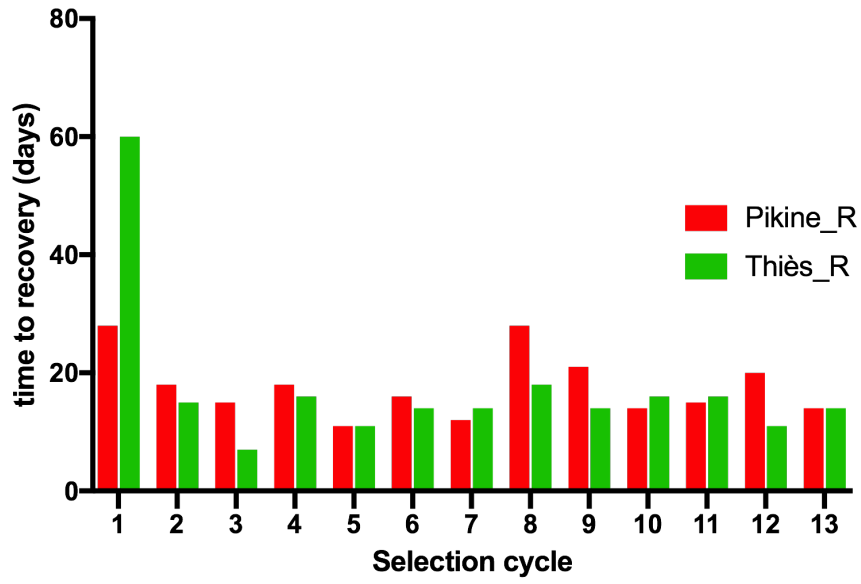

**Fig. S1.** Recovery period for selected lines Pikine\_R and Thiès\_R following each Dihydroartemisinin (DHA) pulse over 13 selection cycles with increasing drug concentration.

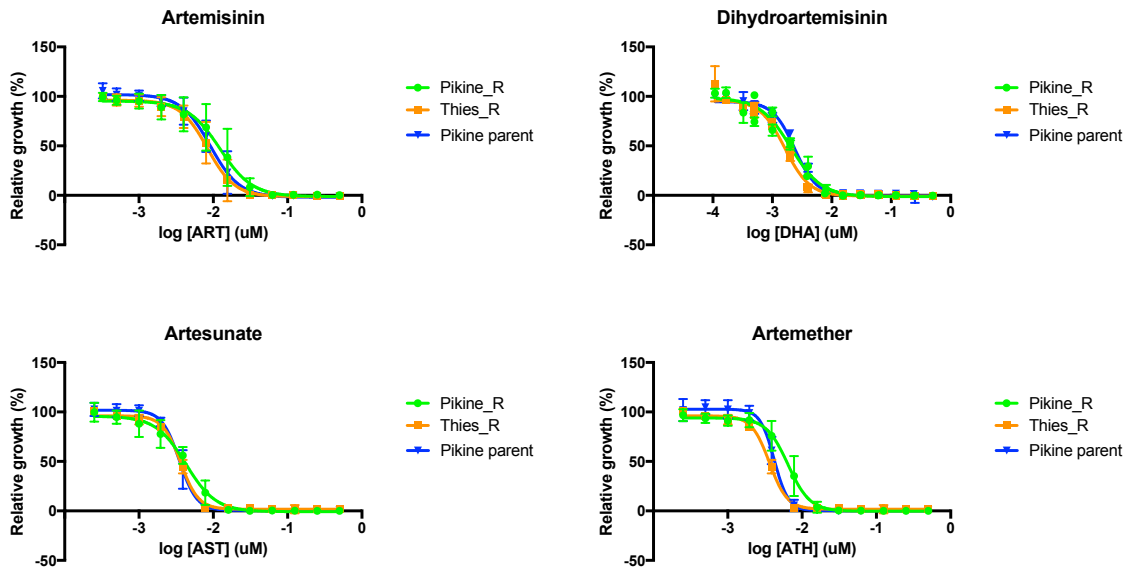

**Fig. S2.** Selected lines Pikine\_R and Thies\_R after 13 selection cycles under increasing drug pressure show no change in EC<sub>50</sub> in response to artemisinin or its derivatives. Parasite drug sensitivity was measured by 72-hour *in vitro* assays with SYBR Green. The Thies parent response is not shown as it is virtually indistinguishable from that of the Pikine parent.

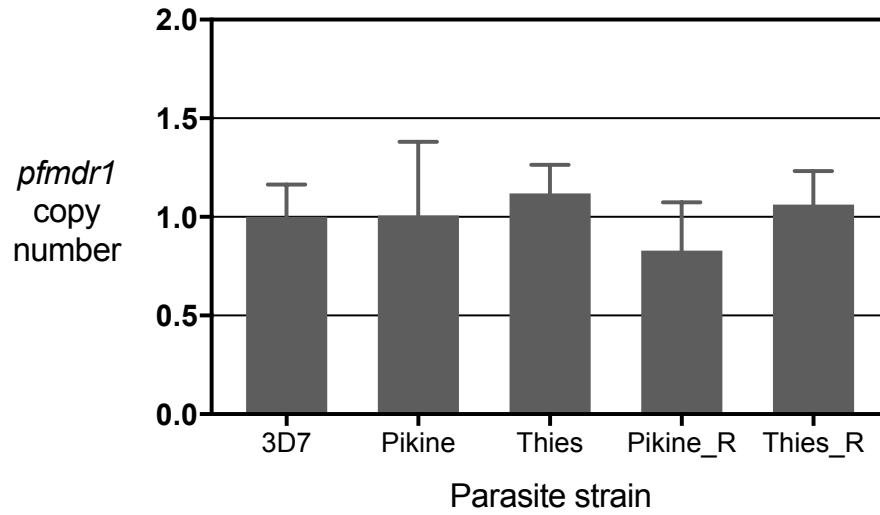

**Fig. S3.** Copy number of *pfmdr1* as estimated from quantitative real-time polymerase chain reaction assays in 3D7, a laboratory line, both parental lines, and selected lines Pikine\_R and Thies\_R after 13 selection cycles under increasing drug pressure. The *pfmdr1* copy number was normalized to that of the gene for seryl tRNA.

| Gene Name                                     | Gene ID       | Pikine_R     | Thiès_R |
|-----------------------------------------------|---------------|--------------|---------|
| conserved Plasmodium protein unknown function | PF3D7_1433800 | S1054F       | I575M   |
| transporter putative                          | PF3D7_0209600 | D1035N       |         |
| coronin                                       | PF3D7_1251200 | R100K, E107V | G50E    |
| autophagy-related protein 7, putative (ATG7)  | PF3D7_1126100 | N1041S       |         |

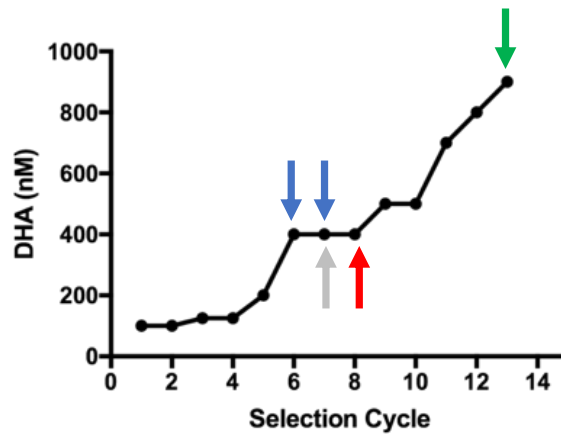

**Fig. S4.** Timeline of the appearance for some of the mutations after intermittent Dihydroartemisinin (DHA) pulse. The mutations were identified via Sanger sequencing after PCR amplification of the bulk gDNA. *PF3D7\_1433800* I575M in Thiès\_A was the first mutation to appear after six selection cycles followed by S1054F (*PF3D7\_1433800*) and D1035N (*PF3D7\_0209600*) in Pikine\_R. All mutations in *pfcoronin* appeared after eight selection cycles.

**A. Homology region for G50E replacement: 501bp**

GTATAGCTTGTAGTGCTGGATATATTGCTgtaaggaaaaaaaaaaaaataataataataaaaaattaaaa  
 tgtacaaatgatgcagtatatatgtatatgtatattatgtatatatattatgtatatatgtatgtacatattt  
 atgtatgtatatatatttgggtgcgctttaagattaattcattattcatatatatcgttttatgatgtttggt  
 catattatagGTACCATGGCAAGTTGAGGGTGAAGGAATGATCGGAGTTATCAGATTAGAAAAATCAAGTGA  
 GAAATCCCCCTGTAATAAAATTGAAGAGTCATACATCTCCCATCCTTGATTTGTCATTTAACCCGTGTTAT  
 AGTGAGATATTAGCTTCATGTTTCAGAAGATATGTCTATAAGAATATGGGAGATACGTCATGAGGATGAGAA  
 TGTGAATGAGGTAAAGGATCCTTTATGTATATTAATGGTCATAAGAAAAAAGTAAATATATTATCATGGA  
ATCC

Guide RNA for Cas9 plasmid

Guide 1 5' CCATGGCAAGTTGAAGGGGG

Guide 2 5' ATCCTTGATTTGTCATTTAA

WT AA Sequence: VPWQVEGGGMIGVIRLEN

Modified AA Sequence: VPWQVEGEMIGVIRLEN

**B.**

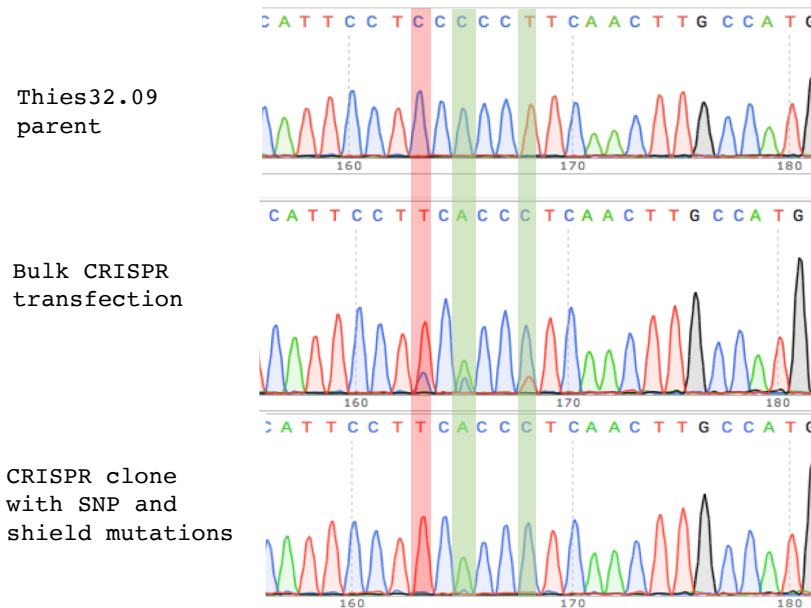

**Fig. S5. A.** CRISPR gene editing strategy for generating *pfcoronin* mutants in SenTh032.09

(Thiès) parental background. Homology region with primer sequences underlined, *pfcoronin* mutated site indicated in red, shield mutations in green, protospacer adjacent motif (PAM) sequences highlighted in yellow. Shield mutations were added for guide 1 but not guide 2. **B.** Sanger sequencing confirmation of CRISPR edited parasite gDNA from bulk transfection and an individual clone highlighting the target SNP in red and shield mutations in green.

**A.** Homology region for R100K E107V replacement: 500bp

ggtgcgctttaagattaattcattattcatatatatcgttttatatgatttgttcatattatagGTACCA  
TGGCAAGTTGAAGGGGGAGGAATGATCGGAGTTATCAGATTAGAAAATCAAGTGAGAAATCCCCCTGTAAT  
AAAATTGAAGAGTCATACATCTCCCATCCTTGATTTGTCATTTAACCCGTGTTATAGTGAGATATTAGCTT  
CATGTTTCAAGATATGTCTATAAAAATATGGGAGATTCGACATGTGGATGAGAATGTGAATGAGGTAAAG  
GATCCTTTTATGTATATTAATGGTCATAAGAAAAAAGTAAATATATTATCATGGAATCCTATGAATTATTT  
TATATTATCATCTACCTCTTTTGATTCTTCTGTTAATATATGGGATATAGAAAATGAGAAGAAAGCCTTTG  
AAATAAATATGCCAAAGAAATTAAGTTCTTTACAATGGGATATCGGTGGTAATTTATTAAGTGGAACTTGT  
CAG

Guide RNA for Cas9 plasmid

Guide 1 5' GAATATGGGAGATACGTCATG

Guide 2 5' TGAGGATGAGAATGTGAATG

WT AA Sequence: SEDMSIRIWEIRHEDENVNEV

Modified AA Sequence: SEDMSIKIWEIRHVDENVNEV

**B.**

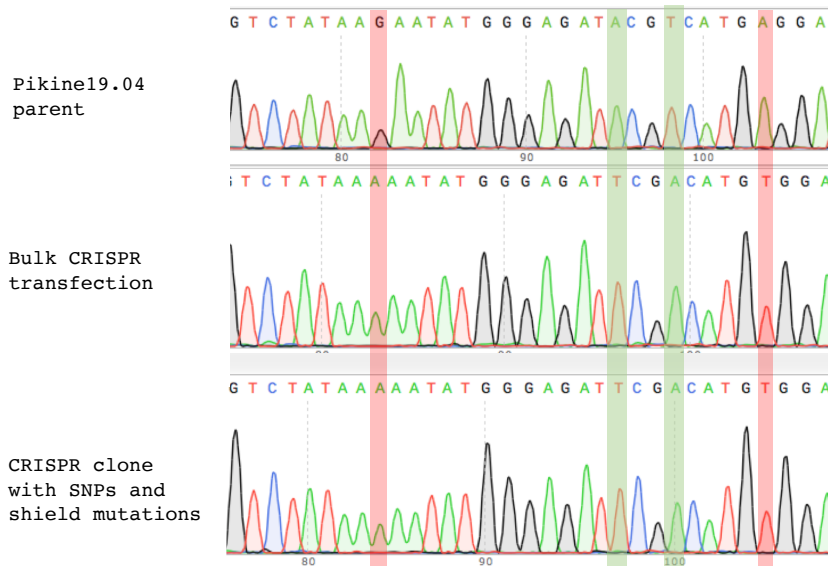

**Fig. S6. A.** CRISPR gene editing strategy for generating *pfcoronin* mutants in SenP019.04

(Pikine) parental background. Homology region with primer sequences underlined, *pfcoronin* mutated sites indicated in red, shield mutations in green, protospacer adjacent motif (PAM) sequences highlighted in yellow. Shield mutations were added for guide 1 but not guide 2.

**B.** Sanger sequencing confirmation of CRISPR edited parasite gDNA

highlighting the target SNPs in red and shield mutations in green. The bulk transfection and individual clone sequencing chromatograms were virtually indistinguishable.

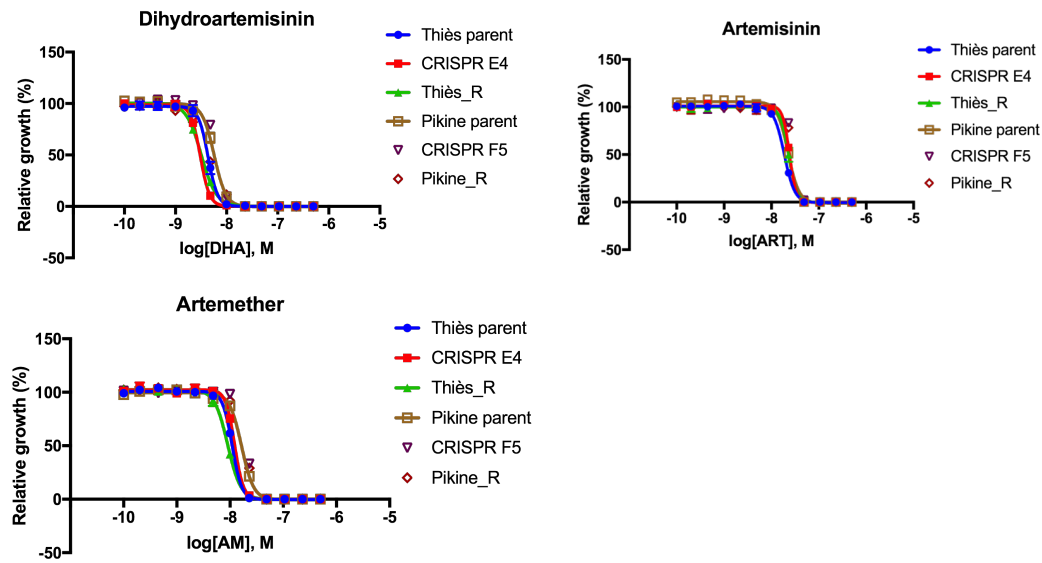

**Fig. S7.** Pikine and Thiès CRISPR *pfcoronin* mutants show no change in  $EC_{50}$  in response to artemisinin (ART) and its derivatives. *Pfcoronin* mutations identified in Pikine\_R (R100K, E107V) and Thiès\_R (G50E) were knocked into their respective parents to obtain independent clones in each background Thiès (CRISPR E4) and Pikine (CRISPR F5). Parasite drug sensitivity was measured by 96-hour *in vitro* assays with SYBR Green. Only results for one CRISPR clone per background are shown as the results were virtually indistinguishable from other clones.





|                          |                                                              |     |
|--------------------------|--------------------------------------------------------------|-----|
| TgondiiTGME49_216970     | ADSQLAQE-LQSEVASLKAQLTELDRLRKENEELKANGG---DTAALLQEN---QELKAN | 473 |
| PfalciparumPF3D7_1251200 | SKSILIQDNNNPKKGSVMRQFTKKFTFRKKKGTVEIQGEIIGETKSSIEADFEVLESKEN | 467 |
| PgaboniPGSY75_1251200    | SKSIIIQDNNNPKKDSIMRQFTKKFTFRKKKGTVEIQGEIIGETKSSIEADFEVLESKEN | 435 |
| PvivaxPVP01_1468300      | FNSIIIGEEYTSKRTSIIROFTKKFTFFKKGLHNDGFSSVDSFKESV-----         | 454 |
| PcoatneyiPCOAH_00051520  | FNSIIIGEEYTAKRTSIIROLTKKFTFFKKGPHNDGFSSVGSFKESV-----         | 454 |
| PknowlesiPKNH_1471200    | FNSIIIGEDYTSKRTSIIROLTKKFTFFKKGIHNDGFSSVNSFKESV-----         | 454 |
| PyoeliiPY01337           | MDSILIGDPSLDKKSFIIRQFTKRFTFFKKNNNIEFNNDNDDDD-----            | 440 |
| PbergheiPBANKA_1464100   | MDSILIGDPCLDKKSFIIRQFTKRFTFFKKNNNIEFNNN-----                 | 447 |
| PchabaudiPCHAS_1466400   | MDSILIGDPCLDKRSFIIRQFTKRFTFFKKNNNIEFNNNLN-----               | 449 |
|                          | . * : : : : * : * : . .                                      |     |
| TgondiiTGME49_216970     | AQE--LE----TLR---KENAELKAKIKELSAQSAMAVPSTSEDPQLKMRVSELAEALS  | 523 |
| PfalciparumPF3D7_1251200 | KKGNKLNEAPKFLFACEDVEICHLDNVDDDDYLIIVNGTNEPYEETVIKTNENENYKE-- | 525 |
| PgaboniPGSY75_1251200    | KNANKLNEDPKFLFASDVEVCHLDNVDDDDYLIINGANQPYEETVIKTNENEHYKE--   | 493 |
| PvivaxPVP01_1468300      | -----FIYPKSFK-----EKGLLTEQGGAQFSSSNSLARGAEAAARE--            | 491 |
| PcoatneyiPCOAH_00051520  | -----FIYPKSFK-----EKWLLTEKGGQFSGKNSLEKGPTEKEEQ--             | 491 |
| PknowlesiPKNH_1471200    | -----FIYPKSFK-----EKWLLTEKGGAQFSSNSLARGAEAAARE--             | 491 |
| PyoeliiPY01337           | -----NNHNSSESSFNINDSYQNDE--                                  | 460 |
| PbergheiPBANKA_1464100   | -----SSESFNINDSKNEG--                                        | 462 |
| PchabaudiPCHAS_1466400   | -----ISSESFNINDSEQTEE--                                      | 466 |
|                          | . : :                                                        |     |
| TgondiiTGME49_216970     | NEKSTTAQLEARLRDLEGRFISAASKQAAEQEAETLKERVQELEAKNRELKTQMEA--   | 581 |
| PfalciparumPF3D7_1251200 | NNDS-----SIQSIRS-----NSKSIEKND-----DDNNNN---N---NDNTLQ       | 558 |
| PgaboniPGSY75_1251200    | NNDT-----SIQSIRS-----NSKSIDNND-----DNNNNN---NKDNDTTCQ        | 528 |
| PvivaxPVP01_1468300      | AAEE-----HP-----DEQ-----PDEHPDEQFPLEGEPFPCD                  | 518 |
| PcoatneyiPCOAH_00051520  | GQQE-----EHSPLENEQPCD                                        | 507 |
| PknowlesiPKNH_1471200    | GQQT-----GQ-----QTGQET-----GQQDELEEFPLESEQPCD                | 521 |
| PyoeliiPY01337           | NKKT-----RF-----FVKDKD-----DDNDENQ-----NCM                   | 482 |
| PbergheiPBANKA_1464100   | NKKT-----KI-----SIEDK-----DNDENK-----NSV                     | 482 |
| PchabaudiPCHAS_1466400   | KKKI-----KI-----SIEDI-----DNDKKN-----SGE                     | 486 |
|                          | .                                                            |     |
| TgondiiTGME49_216970     | ---HGTLH---RAATLSGLSDMKNELNEMRDFFRDILHQAQDEAA-----           | 621 |
| PfalciparumPF3D7_1251200 | SEEN-EEHL-----KHISII-HEENNPKNFFKNVLDNILDMMCKSTATVL           | 602 |
| PgaboniPGSY75_1251200    | SQEN-QQHL-----KQISSI-HEENNPKNFFKNVLDNILDMMCKSTATVL           | 572 |
| PvivaxPVP01_1468300      | GTSRGTSELVPRSGDPVRLARGR-TRRGSG---ANCFDALRCARLCRRREF--        | 565 |
| PcoatneyiPCOAH_00051520  | GYSRGTSELV-----RLSRGE-TQRKTC---VTCFDALRCARLCRRKEPQE          | 550 |
| PknowlesiPKNH_1471200    | GESRGTSELV-----GLSRGK-TQRAGG---SNCFNLRCARLCRGRK---           | 560 |
| PyoeliiPY01337           | TSGRMKEEC-VQ-TETSEFN-KI-KNDNNS---NKCLDTITCKKLFQKTN---        | 525 |
| PbergheiPBANKA_1464100   | ISDKVKEEY-IQ-TETSEFN-KI-EYNTNS---NKCLGTITCKKLFQKTN---        | 525 |
| PchabaudiPCHAS_1466400   | FSDRLKEEY-VQ-TETIEFN-KI-EENTNS---NKFLDTITCKKWFQKPN---        | 529 |
|                          | .                                                            |     |

**Fig. S8.** Multiple sequence alignment of Coronin protein sequences from several *Plasmodium* species and *Toxoplasma gondii*. Highlighted in grey is the *Plasmodium falciparum* Coronin full amino acid sequence and highlighted in yellow are G50, R100 and E107 residues, which were found to be mutated in the DHA selected Senegalese parasites Thiès\_R and Pikine\_R. Analyses were done using the Clustal Omega multiple sequence alignment tool through EMBL.

**Table S1.** Summary of RSA values for all parasite lines

| <b>Parasite line</b>            | <b>RSA survival (%)</b> | <b>Standard error of measurement (SEM)</b> |
|---------------------------------|-------------------------|--------------------------------------------|
| Pikine19.04 (parent)            | 0.99                    | 0.26                                       |
| Pikine_R (8 cycles)             | 7.18                    | 0.80                                       |
| Pikine_R (13 cycles)            | 7.83                    | 0.98                                       |
| Pikine19.04 (parent)            | 0.55                    | 0.08                                       |
| Pikine CRISPR F4 (R100K, E107V) | 6.75                    | 0.91                                       |
| Pikine CRISPR F5 (R100K, E107V) | 9.35                    | 1.09                                       |
| Thiès32.09 (parent)             | 0.78                    | 0.16                                       |
| Thiès_R (8 cycles)              | 8.16                    | 0.76                                       |
| Thiès_R (13 cycles)             | 7.62                    | 1.46                                       |
| Thiès32.09 (parent)             | 0.48                    | 0.09                                       |
| Thiès CRISPR D4 (G50E)          | 5.22                    | 1.38                                       |
| Thiès CRISPR E4 (G50E)          | 5.30                    | 0.72                                       |

**Table S2.** PCR resequencing primers to amplify candidate genes and *Pfkelch13*

(PF3D7\_1343700). For mutagenesis primers, shield mutations are highlighted in green and targeted mutation(s) are highlighted in red.

| Primer target | Primer name    | Sequence 5'-3'                                              |
|---------------|----------------|-------------------------------------------------------------|
| PF3D7_1343700 | kelch13 Fwd1   | ATGGAAGGAGAAAAAGTAAAAACAAAAGC                               |
| PF3D7_1343700 | kelch13 Rev1   | ACGGTTTTCTAATTCTTTGTACAATCGTAC                              |
| PF3D7_1343700 | kelch13 Fwd2   | GAAACGGAATTAAGTGATGCTAGTGA                                  |
| PF3D7_1343700 | kelch13 Rev2   | CCAGCATTGTTGACTAATATCTAATAATTCCA                            |
| PF3D7_1343700 | kelch13 Fwd3   | CATTCCCATTAGTATTTTGTATAGGTGGAT                              |
| PF3D7_1343700 | kelch13 Rev3   | TTATATATTTGCTATTAACGGAGTGACCAA                              |
| PF3D7_1251200 | coronin fwd1   | ATGTATAATGTTCCCTTAATCAAGA                                   |
| PF3D7_1251200 | coronin rev1   | CTTGGCATATTTATTCAAAGG                                       |
| PF3D7_1251200 | coronin fwd2   | GTGGTATAGCTTGTAGTGCT                                        |
| PF3D7_1251200 | coronin rev2   | CTTTAAACTCCATAATTTCAATTCTC                                  |
| PF3D7_1251200 | coronin fwd3   | AAGTTCTTTACAATGGGATATCG                                     |
| PF3D7_1251200 | coronin rev3   | CTGTCTCATGACAGAACCCT                                        |
| PF3D7_1251200 | coronin fwd4   | GATTTATATCCTCCTATTATTATGAG                                  |
| PF3D7_1251200 | coronin rev4   | TACCGTTGCTGTACTTTTACAC                                      |
| PF3D7_1251200 | coronin fwd5   | <u>GAGCTCAAGCTT</u> GTATAGCTTGTAGTGCTGGA<br>TATATTG         |
| PF3D7_1251200 | coronin rev5   | <u>GAGCTCAAGCTT</u> GGATTCCATGATAATATATTT<br>ACTTTTTTCTTATG |
| PF3D7_1251200 | coronin mutfw1 | gGTACCATGGCAAGTTGAGGGTGAAGGAATGA<br>TCGGAGTTATC             |
| PF3D7_1251200 | coronin mutrv1 | CTGATAACTCCGATCATTCTTCAACCCTCAACT<br>TGCCATGGTAC            |
| PF3D7_1251200 | coronin fwd6   | GGTGCGCTTTAAAGATTAATTC                                      |
| PF3D7_1251200 | coronin rev6   | CAGAAGAATCAAAAGAGGTAGATG                                    |
| PF3D7_1251200 | coronin seq1   | CCTCATTACATTCTCATCCTCATG                                    |
| PF3D7_1251200 | coronin fwd7   | <u>GAGCTGCTAGCGG</u> TGCGCTTTAAAGATTAATT<br>C               |
| PF3D7_1251200 | coronin rev7   | <u>GAGCTCAAGCTT</u> CTGACAAGTTCCACTTAATA<br>AATTAC          |
| PF3D7_1251200 | coronin mutfw2 | GTCTATAAAATATGGGAGATTCGCATGTGG<br>ATGAGAATGTG               |

|               |                           |                                                   |
|---------------|---------------------------|---------------------------------------------------|
| PF3D7_1251200 | coronin mutrv2            | CTCATTACATTCTCATCCACATGTCGAATCTC<br>CCATATTTTATAG |
| PF3D7_1251200 | coronin fwd8              | GAAATCCCCCTGTAATAAAATTG                           |
| PF3D7_1251200 | coronin rev8              | CTTGTTTTCTAGGATCTATTATATGTATCTG                   |
| PF3D7_1251200 | coronin seq2              | CCACCGATATCCCATTGTAAAGAAC                         |
| PF3D7_0209600 | PF3D7_0209600 fwd         | GTACTATATATTGGAAATATAGAAACC                       |
| PF3D7_0209600 | PF3D7_0209600 rev         | ATGGGAAAAGAAACAATAGGAGC                           |
| PF3D7_1126100 | ATG7 fwd                  | CAAAGGTAATGGATATACCTATGC                          |
| PF3D7_1126100 | ATG7 rev                  | TGCTACCGTAATACCTAAAGGAG                           |
| PF3D7_1433800 | PF3D7_1433800 SNP1<br>fwd | CCATACAAATGTCAAAATATAACAAACC                      |
| PF3D7_1433800 | PF3D7_1433800 SNP1 rev    | CTAGTTGCACGATTTTGATAATTTCC                        |
| PF3D7_1433800 | PF3D7_1433800 SNP2<br>fwd | GATGAATAATAATATGTTTTATGATAATGG                    |
| PF3D7_1433800 | PF3D7_1433800 SNP2 rev    | AACTGATAATAATTTAAATGATGTTGG                       |
| PF3D7_1121900 | PF3D7_1121900 fwd         | GATCAAAATTCAAACAATGCGTTCTAG                       |
| PF3D7_1121900 | PF3D7_1121900 rev         | CTGTTGAACCATCAAATGGAACGG                          |
| PF3D7_1324300 | PF3D7_1324300 fwd         | AGTTCAGTTGTTATCATGTTC                             |
| PF3D7_1324300 | PF3D7_1324300 rev         | TGGCACATTCTTCGTTTTCC                              |
| PF3D7_1422400 | PF3D7_1422400 fwd         | CGTTTACCATGAGTTATGTACATCAAG                       |
| PF3D7_1422400 | PF3D7_1422400 rev         | ACACGGAACAATAAATATTTCTGTACTC                      |
